# Supplementary material for: In silico identification of enhancers on the basis of a combination of transcription factor binding motif occurrences
Source: PubMed Central journal article supplement (PMC5007594; doi:10.1038/srep32476), 2016-09-01
Supplement: srep32476-s1.pdf [file srep32476-s1.pdf]

## Supplementary Information

In silico identification of enhancers on the basis of a combination of transcription factor binding motif occurrences

Yaping Fang<sup>1,2\*</sup>, Yunlong Wang<sup>1,2</sup>, Qin Zhu<sup>1,2</sup>, Jia Wang<sup>1,2</sup>, Guoliang Li<sup>1,2,3\*</sup>

<sup>1</sup>Agricultural Bioinformatics Key Laboratory of Hubei Province, <sup>2</sup>College of Informatics,

<sup>3</sup>National Key Laboratory of Crop Genetic Improvement, Huazhong Agricultural University, Wuhan

430070, China.

\*To whom correspondence should be addressed.

Email: ypfang@mail.hzau.edu.cn, guoliang.li@mail.hzau.edu.cn

Supplementary Figures

Supplementary Figures S1

Supplementary Figures S2

Supplementary Tables

Supplementary Table S1

Supplementary Dataset

Supplementary Dataset S1



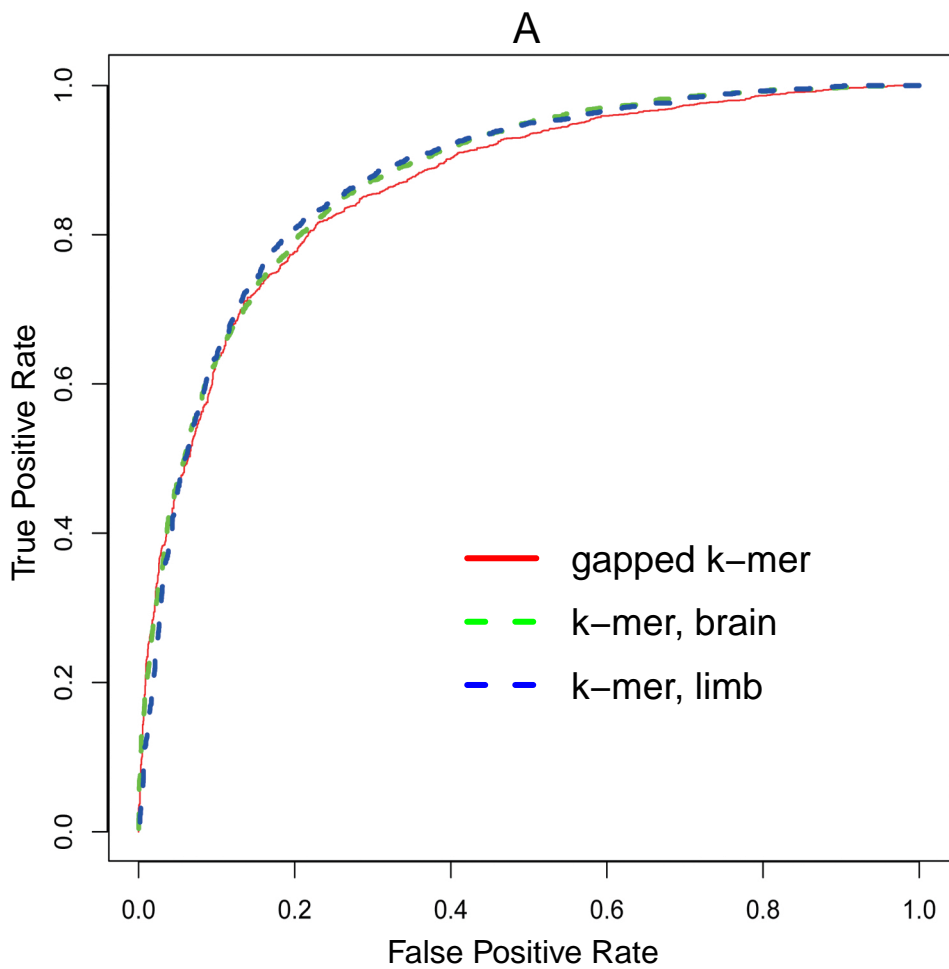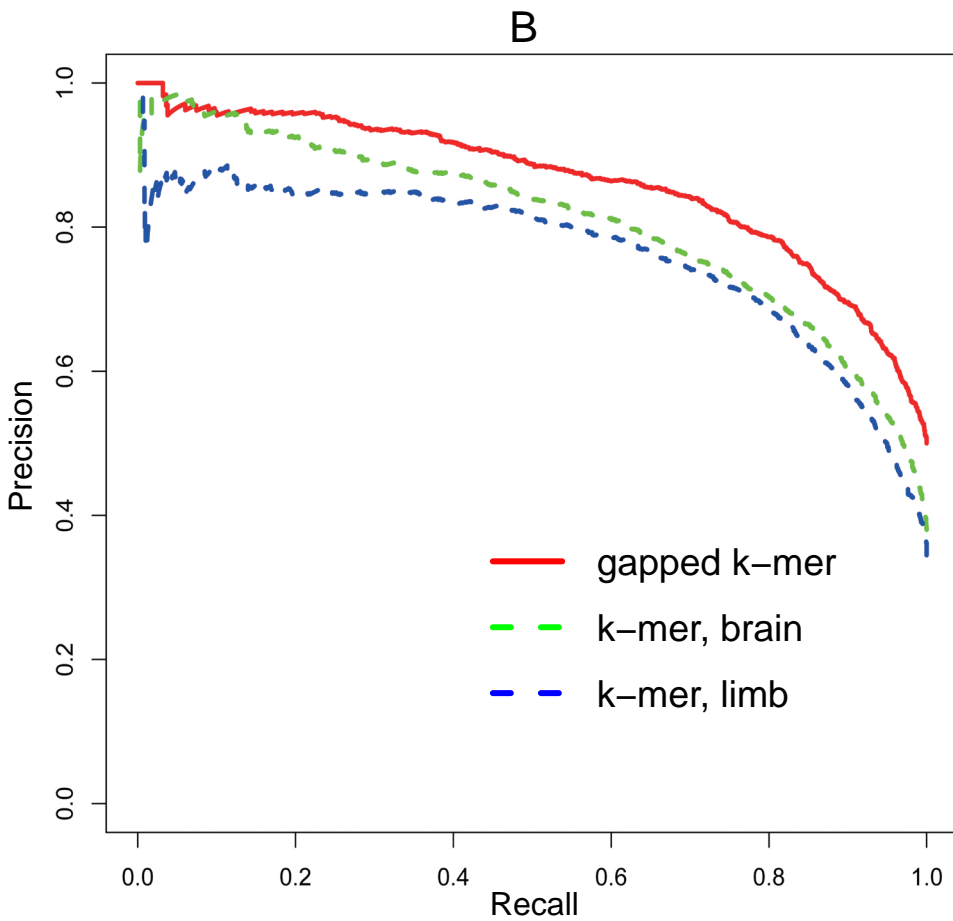

Figure S2. The receiver operator characteristic (ROC) and precision-recall curves for different datasets. Figure S2A represents the ROC curves for different datasets. Figure S2B shows the precision-recall curves for different datasets. The value of AUC is 0.8742 for the mouse embryo brain dataset (green dash line), 0.8738 for the mouse limb dataset (blue dash line) and 0.8643 for the binding sites of P300 protein (red line).
